# Supplementary material
Source: PubMed Central journal article supplement (PMC9602053)
Supplement: NIHMS1842185-supplement-Supplementary_Table_1.pdf [file NIHMS1842185-supplement-Supplementary_Table_1.pdf]

# Supplementary Material

## Anticholinergic Medication Burden in Parkinson's Disease Outpatients

**Supplementary Table 1.** Usage of each individual anticholinergic medication and corresponding scores for ACB, ADS, and ARS.

| Drug Class       | Medication        | N (%)     | ACB score | ADS score | ARS score |
|------------------|-------------------|-----------|-----------|-----------|-----------|
| Antiparkinsonian | Amantadine        | 41 (5.5)  | 2         | 1         | 2         |
|                  | Trihexyphenidyl*  | 12 (1.6)  | 3         | 3         | -         |
|                  | Benzotropine*     | 2 (0.3)   | 3         | 3         | 3         |
| Antidepressants  | Sertraline        | 95 (12.7) | -         | 1         | -         |
|                  | Trazodone*        | 35 (4.7)  | 1         | -         | 1         |
|                  | Bupropion         | 19 (2.5)  | 1         | -         | -         |
|                  | Fluoxetine*       | 17 (2.3)  | -         | 1         | -         |
|                  | Paroxetine        | 11 (1.5)  | 3         | 1         | 1         |
|                  | Venlafaxine       | 10 (1.3)  | 1         | -         | -         |
|                  | Doxepin*          | 4 (0.5)   | 3         | 3         | -         |
|                  | Amitriptyline*    | 4 (0.5)   | 3         | 3         | 3         |
|                  | Nortriptyline*    | 2 (0.3)   | 3         | 3         | 2         |
| Antipsychotics   | Quetiapine*       | 34 (4.5)  | 3         | -         | 1         |
|                  | Aripiprazole      | 5 (0.7)   | 1         | -         | -         |
|                  | Olanzapine*       | 5 (0.7)   | 3         | 1         | 2         |
|                  | Clozapine         | 4 (0.5)   | 3         | 3         | 2         |
|                  | Risperidone       | 1 (0.1)   | 1         | -         | 1         |
| Antihistamines   | Cetirizine*       | 14 (1.9)  | 1         | -         | 2         |
|                  | Loratadine*       | 11 (1.5)  | 1         | -         | 2         |
|                  | Diphenhydramine*  | 7 (0.9)   | 3         | 3         | 3         |
|                  | Levocetirizine*   | 6 (0.8)   | 1         | -         | 2         |
|                  | Hydroxyzine*      | 3 (0.4)   | 3         | 3         | 3         |
|                  | Doxylamine*       | 2 (0.3)   | 3         | -         | -         |
|                  | Chlorpheniramine* | 1 (0.1)   | 3         | 3         | 3         |
|                  | Promethazine*     | 1 (0.1)   | -         | -         | -         |
| Benzodiazepines  | Clonazepam        | 33 (4.4)  | -         | 1         | -         |
|                  | Alprazolam        | 11 (1.5)  | 1         | 1         | -         |
|                  | Lorazepam         | 10 (1.3)  | -         | 1         | -         |
|                  | Temazepam         | 3 (0.4)   | -         | 1         | -         |
|                  | Diazepam          | 1 (0.1)   | 1         | 1         | -         |
| Muscle relaxants | Cyclobenzaprine*  | 3 (0.4)   | 2         | 2         | 2         |
|                  | Carisoprodol*     | 2 (0.3)   | -         | -         | -         |
|                  | Methocarbamol*    | 1 (0.1)   | 3         | -         | 1         |
| Analgesics       | Tramadol          | 8 (1.1)   | -         | 1         | -         |
|                  | Codeine           | 3 (0.4)   | 1         | 1         | -         |
|                  | Oxycodone         | 3 (0.4)   | -         | 1         | -         |
|                  | Morphine          | 1 (0.1)   | 1         | 1         | -         |
| Urological Drugs | Tamsulosin*       | 50 (6.7)  | -         | -         | -         |
|                  | Oxybutynin*       | 17 (2.3)  | 3         | 3         | 3         |

|                                                                                |                          |          |                                             |                                            |                                            |
|--------------------------------------------------------------------------------|--------------------------|----------|---------------------------------------------|--------------------------------------------|--------------------------------------------|
|                                                                                | Tolterodine*             | 5 (0.7)  | 3                                           | 3                                          | 2                                          |
|                                                                                | Terazosin*               | 5 (0.7)  | -                                           | -                                          | -                                          |
|                                                                                | Solifenacin              | 4 (0.5)  | 3                                           | -                                          | -                                          |
|                                                                                | Fesoterodine             | 3 (0.4)  | 3                                           | -                                          | -                                          |
| Anti-arrhythmics                                                               | Quinidine                | 2 (0.3)  | 1                                           | -                                          | -                                          |
|                                                                                | Digoxin                  | 1 (0.1)  | 1                                           | 1                                          | 1                                          |
| Antihypertensives                                                              | Metoprolol               | 71 (9.5) | 1                                           | -                                          | -                                          |
|                                                                                | Atenolol                 | 14 (1.9) | 1                                           | -                                          | -                                          |
|                                                                                | Diltiazem                | 9 (1.2)  | -                                           | 1                                          | -                                          |
|                                                                                | Clonidine*               | 7 (0.9)  | -                                           | -                                          | -                                          |
|                                                                                | Hydralazine              | 6 (0.8)  | 1                                           | 1                                          | -                                          |
|                                                                                | Isosorbide               | 6 (0.8)  | 1                                           | 1                                          | -                                          |
|                                                                                | Nifedipine               | 5 (0.7)  | 1                                           | 1                                          | -                                          |
|                                                                                | Doxazosin*               | 3 (0.4)  | -                                           | -                                          | -                                          |
|                                                                                | Guanfacine*              | 1 (0.1)  | -                                           | -                                          | -                                          |
| Diuretics                                                                      | Furosemide               | 33 (4.4) | 1                                           | 1                                          | -                                          |
|                                                                                | Triamterene              | 6 (0.8)  | 1                                           | 1                                          | -                                          |
|                                                                                | Chlorthalidone           | 2 (0.3)  | 1                                           | 1                                          | -                                          |
| Anti-coagulants                                                                | Warfarin                 | 9 (1.2)  | 1                                           | 1                                          | -                                          |
|                                                                                | Dipyridamole             | 3 (0.4)  | 1                                           | 1                                          | -                                          |
| Miscellaneous                                                                  | Famotidine               | 19 (2.5) | -                                           | 1                                          | -                                          |
|                                                                                | Divalproex/valproic acid | 9 (1.2)  | -                                           | 1                                          | -                                          |
|                                                                                | Prednisone               | 9 (1.2)  | 1                                           | 1                                          | -                                          |
|                                                                                | Ranitidine               | 8 (1.1)  | 1                                           | 2                                          | 1                                          |
|                                                                                | Clindamycin              | 4 (0.5)  | -                                           | 1                                          | -                                          |
|                                                                                | Loperamide               | 3 (0.4)  | 1                                           | 1                                          | 2                                          |
|                                                                                | Hyoscyamine*             | 2 (0.3)  | 3                                           | 3                                          | 3                                          |
|                                                                                | Colchicine               | 2 (0.3)  | 1                                           | -                                          | -                                          |
|                                                                                | Meclizine*               | 1 (0.1)  | 3                                           | 3                                          | 3                                          |
|                                                                                | Dicyclomine*             | 1 (0.1)  | 3                                           | 3                                          | 3                                          |
|                                                                                | Methylprednisolone       | 1 (0.1)  | -                                           | 1                                          | -                                          |
|                                                                                | Dexamethasone            | 1 (0.1)  | -                                           | 1                                          | -                                          |
|                                                                                | Oxcarbazepine            | 1 (0.1)  | 2                                           | 2                                          | -                                          |
|                                                                                | Cyclosporine             | 1 (0.1)  | -                                           | 1                                          | -                                          |
|                                                                                | Theophylline             | 1 (0.1)  | 1                                           | 1                                          | -                                          |
| Totals, n (%)<br>prescriptions<br>with score=1<br>with score=2<br>with score=3 |                          | 750      | 468<br>298 (63.7)<br>45 (9.6)<br>125 (26.7) | 447<br>370 (82.7)<br>12 (2.7)<br>65 (14.5) | 369<br>225 (61)<br>101 (27.4)<br>43 (11.7) |

Each medication included in the DBI-Ach is indicated with an asterisk (\*). All reported percentages are calculated with the total number of prescriptions as the denominator (n=750). ACB, Anticholinergic Cognitive Burden scale; ADS, Anticholinergic Drug Scale; ARS, Anticholinergic Risk Scale; DBI-Ach, Drug Burden Index-anticholinergic component.
